# Supplementary material
Source: publisher figshare collection journal article supplement (https://acs.figshare.com/ndownloader/files/4165291)
Supplement: Supplementary file 1 [file 4165291]

#######################################################################
#
#                 Cambridge Crystallographic Data Centre
#                                CCDC 
#
#######################################################################
#
# If this CIF has been generated directly or indirectly from an entry in the 
# Cambridge Structural Database, then it will include bibliographic, chemical, 
# crystal, experimental, refinement or atomic coordinate data resulting from 
# the CCDC's data processing and validation procedures. Files generated from 
# CSD entries are Copyright 2012 Cambridge Crystallographic Data Centre. They 
# may be used in bona fide research applications only, and may not be copied or 
# further disseminated in any form, whether machine-readable or not, except for 
# the purposes of generating routine backup copies on your local computer 
# system.
# 
# Files arising from any other source may also contain material that is the 
# copyright of third parties, including the originator, and you should check 
# with the originator concerning the permitted uses of the information 
# contained in this CIF.
#
# For further information on the CCDC and the free tools enCIFer and Mercury
# for validating and visualising CIF files, please visit www.ccdc.cam.ac.uk
#
#######################################################################

data_shelxl
_symmetry_cell_setting           orthorhombic
_symmetry_space_group_name_H-M   'P 21 21 21'
_symmetry_Int_Tables_number      19
loop_
_symmetry_equiv_pos_site_id
_symmetry_equiv_pos_as_xyz
1 x,y,z
2 1/2+x,1/2-y,-z
3 -x,1/2+y,1/2-z
4 1/2-x,-y,1/2+z
_cell_length_a                   8.6520(3)
_cell_length_b                   11.5412(6)
_cell_length_c                   20.7203(15)
_cell_angle_alpha                90.00
_cell_angle_beta                 90.00
_cell_angle_gamma                90.00
_cell_volume                     2069.01
loop_
_atom_site_label
_atom_site_type_symbol
_atom_site_fract_x
_atom_site_fract_y
_atom_site_fract_z
S1 S 0.32228(5) 0.30376(4) 0.06848(2)
S2 S 1.15401(5) 0.61588(4) 0.32511(2)
O1 O 0.58233(12) 0.83577(9) 0.14674(5)
O2 O 0.36205(11) 0.85066(9) 0.08054(5)
C1 C 0.68329(18) 0.75031(14) 0.11778(8)
C2 C 0.77336(19) 0.80362(15) 0.06110(8)
H2A H 0.8493 0.8602 0.0780
H2B H 0.8310 0.7418 0.0384
C3 C 0.66584(18) 0.86426(14) 0.01356(8)
H3A H 0.7265 0.8983 -0.0222
H3B H 0.5916 0.8079 -0.0048
C4 C 0.5798(2) 0.95869(14) 0.04947(8)
H4A H 0.5066 0.9971 0.0196
H4B H 0.6546 1.0177 0.0646
C5 C 0.49103(18) 0.91134(14) 0.10713(8)
C6 C 0.43989(18) 1.00889(14) 0.15173(8)
H6A H 0.5315 1.0394 0.1748
H6B H 0.3968 1.0726 0.1253
C7 C 0.31938(18) 0.97194(15) 0.20126(8)
H7A H 0.3663 0.9179 0.2328
H7B H 0.2812 1.0406 0.2250
C8 C 0.18586(18) 0.91283(14) 0.16672(8)
H8A H 0.1325 0.9690 0.1383
H8B H 0.1104 0.8835 0.1987
C9 C 0.24852(19) 0.81291(15) 0.12676(8)
H9A H 0.2958 0.7549 0.1559
H9B H 0.1620 0.7750 0.1037
C10 C 0.59316(17) 0.64005(14) 0.10043(8)
C11 C 0.60548(18) 0.58281(14) 0.04199(8)
H11 H 0.6693 0.6145 0.0091
C12 C 0.52647(17) 0.47962(14) 0.03021(8)
H12 H 0.5365 0.4423 -0.0104
C13 C 0.43334(18) 0.43124(13) 0.07749(8)
C14 C 0.42350(18) 0.48661(14) 0.13747(8)
H14 H 0.3626 0.4535 0.1709
C15 C 0.50183(18) 0.58922(14) 0.14840(8)
H15 H 0.4934 0.6259 0.1893
C16 C 0.3848(2) 0.24628(17) -0.00745(10)
H16A H 0.3343 0.1715 -0.0151
H16B H 0.4972 0.2355 -0.0067
H16C H 0.3572 0.3003 -0.0421
C17 C 0.79905(17) 0.71871(13) 0.17084(8)
C18 C 0.80512(18) 0.77684(14) 0.22947(8)
H18 H 0.7354 0.8388 0.2374
C19 C 0.91140(18) 0.74592(15) 0.27660(9)
H19 H 0.9112 0.7847 0.3170
C20 C 1.01781(19) 0.65855(15) 0.26491(8)
C21 C 1.01423(18) 0.60029(14) 0.20639(8)
H21 H 1.0870 0.5406 0.1979
C22 C 0.90463(18) 0.62898(14) 0.16029(8)
H22 H 0.9012 0.5870 0.1209
C23 C 1.2741(2) 0.74409(15) 0.32950(10)
H23A H 1.3196 0.7594 0.2870
H23B H 1.3567 0.7318 0.3611
H23C H 1.2109 0.8105 0.3427

#END
